# Supplementary material for: Facile synthesis of Au23(SC(CH3)3)16 clusters
Source: Royal Society of Chemistry journal article supplement (doi:10.1039/c4tc00059e), 2014-01-01
Supplement: c4tc00059e1.pdf [file c4tc00059e1.pdf]

# Supporting Information for

## Facile synthesis of $\text{Au}_{23}(\text{SC}(\text{CH}_3)_3)_{16}$ clusters

Mahdi Hesari\* and M.S. Workentin\*

Department of Chemistry, The University of Western Ontario, London, N6A 5B7,  
CANADA

Address correspondence to: [mworkent@uwo.ca](mailto:mworkent@uwo.ca)

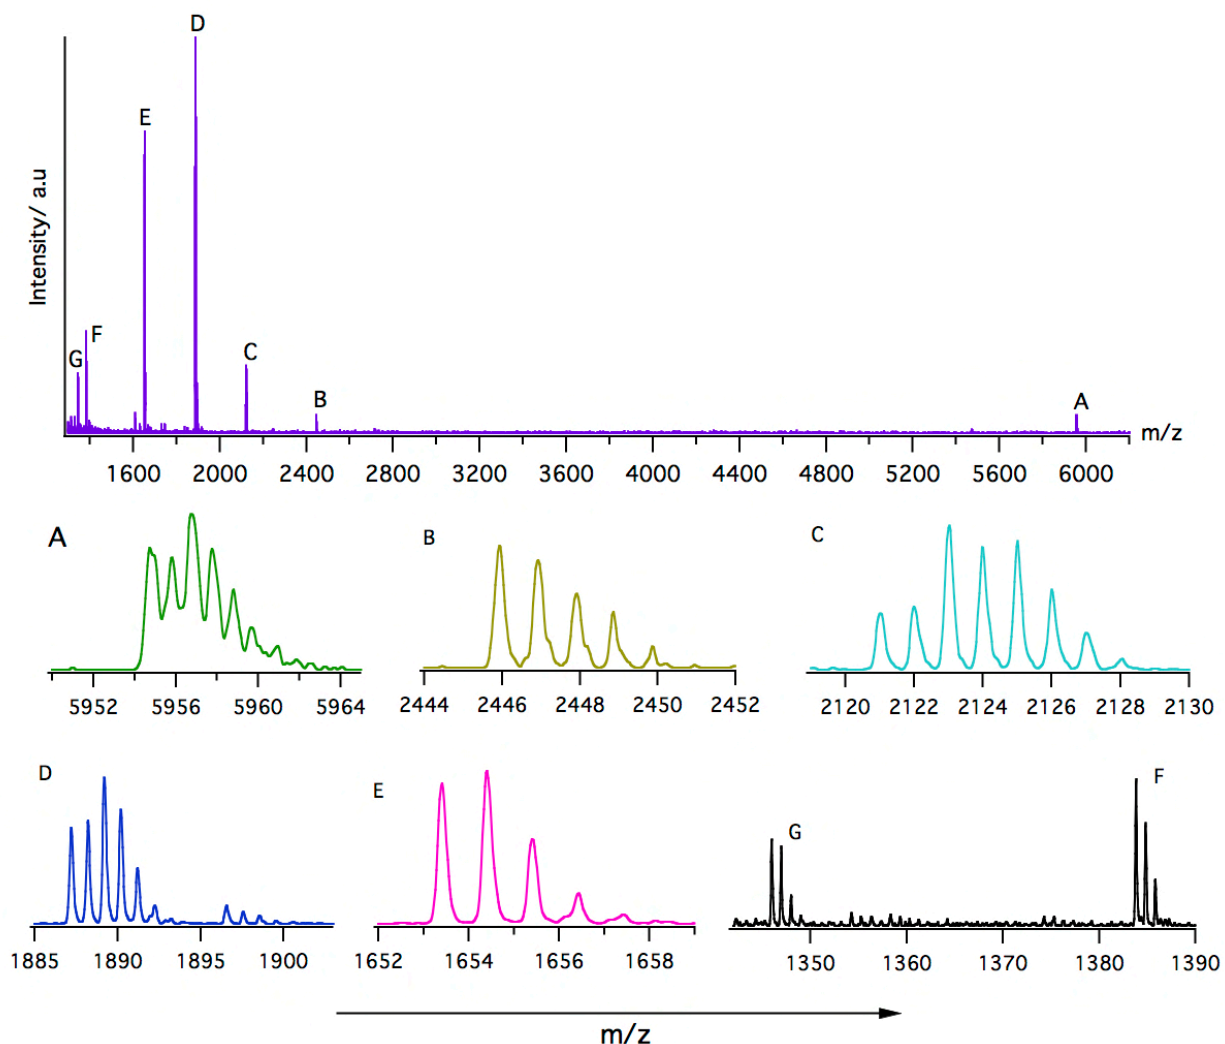

**Figure S1** Expanded ESI fragmented peaks. The x- axis indicates m/z values.

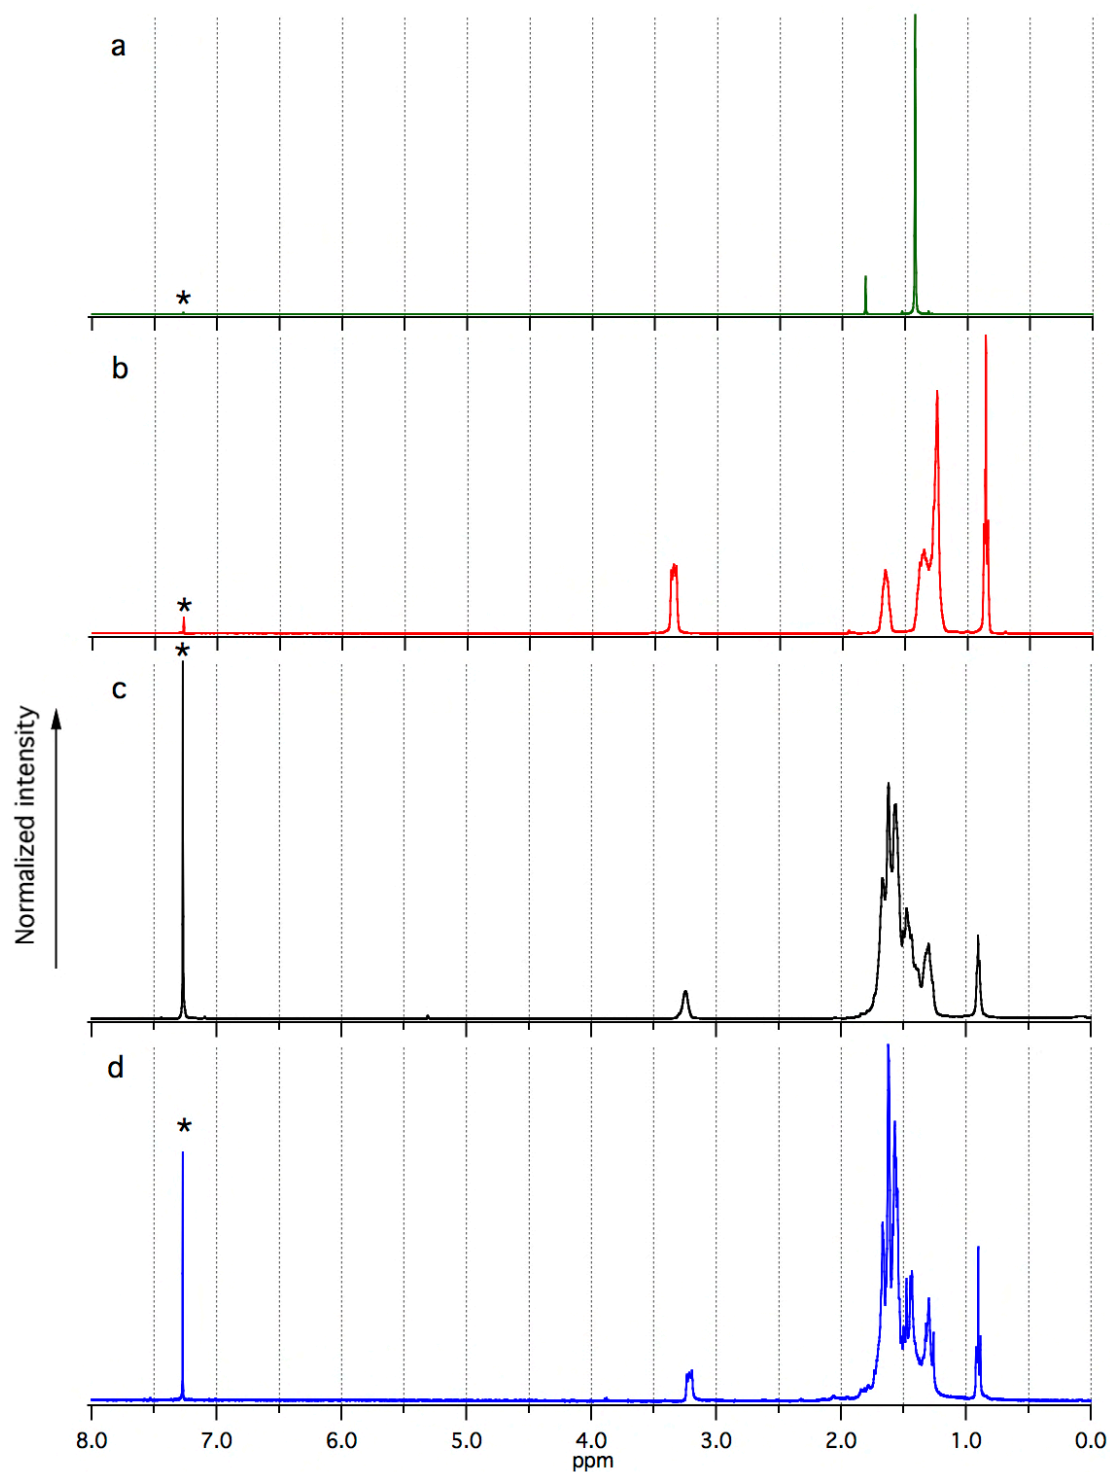

**Figure S2**  $^1\text{H}$ NMR spectra of (a) tert-butyl thiol, (b) tetra-*n*-octylammonium bromide, (c) acetonitrile fraction, and (d) dichloromethane fraction, recorded in  $\text{CDCl}_3$ . The asterisk indicates residual  $\text{CHCl}_3$  solvent peak.

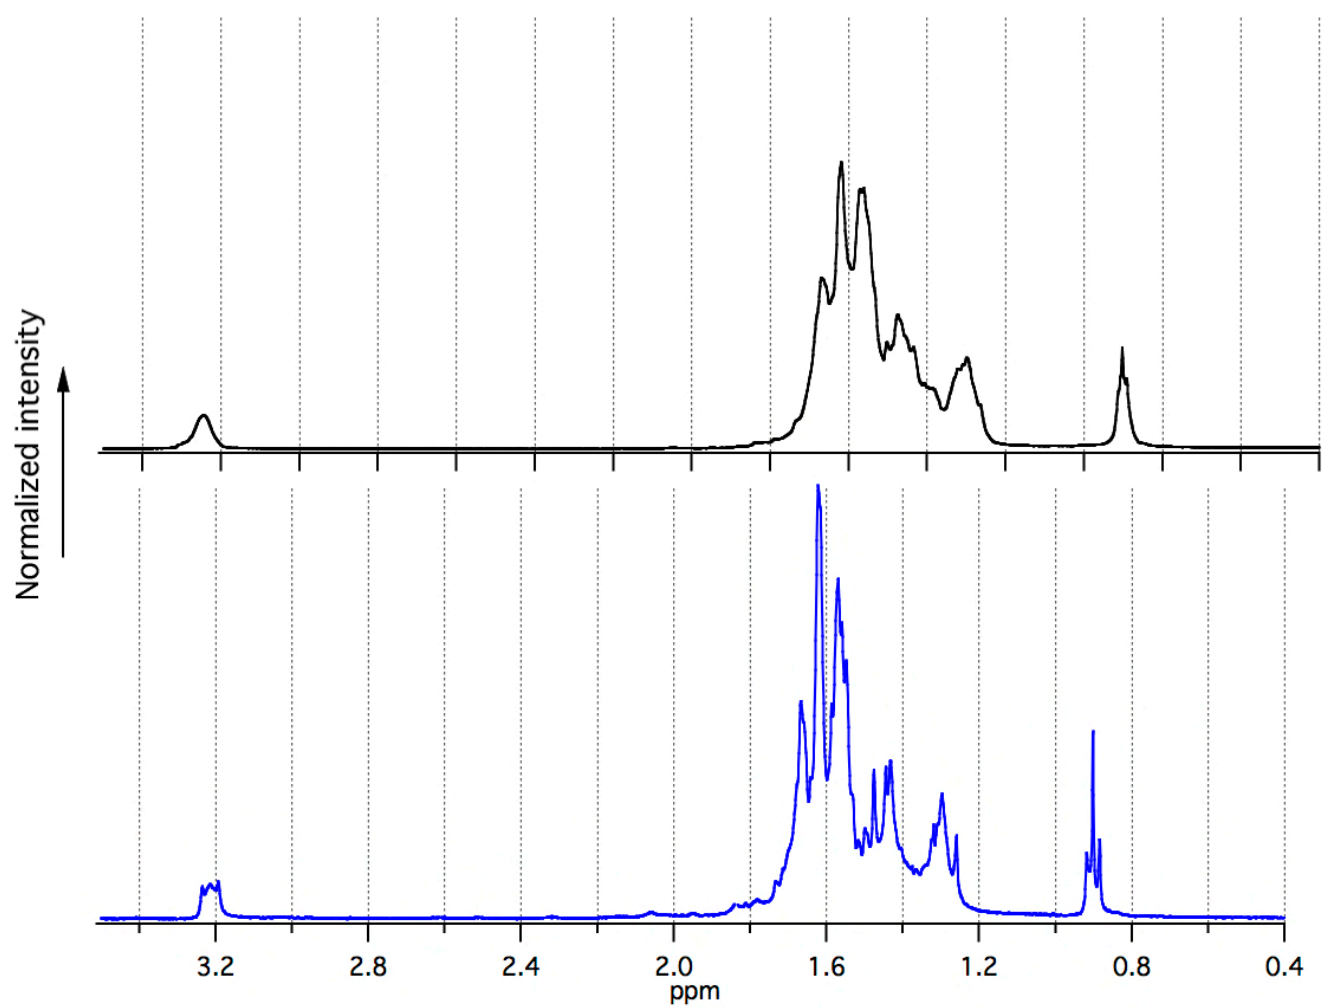

**Figure S3** Expanded  $^1\text{H}$ NMR of (top) acetonitrile fraction and (bottom) dichloromethane fraction recorded in  $\text{CDCl}_3$ .

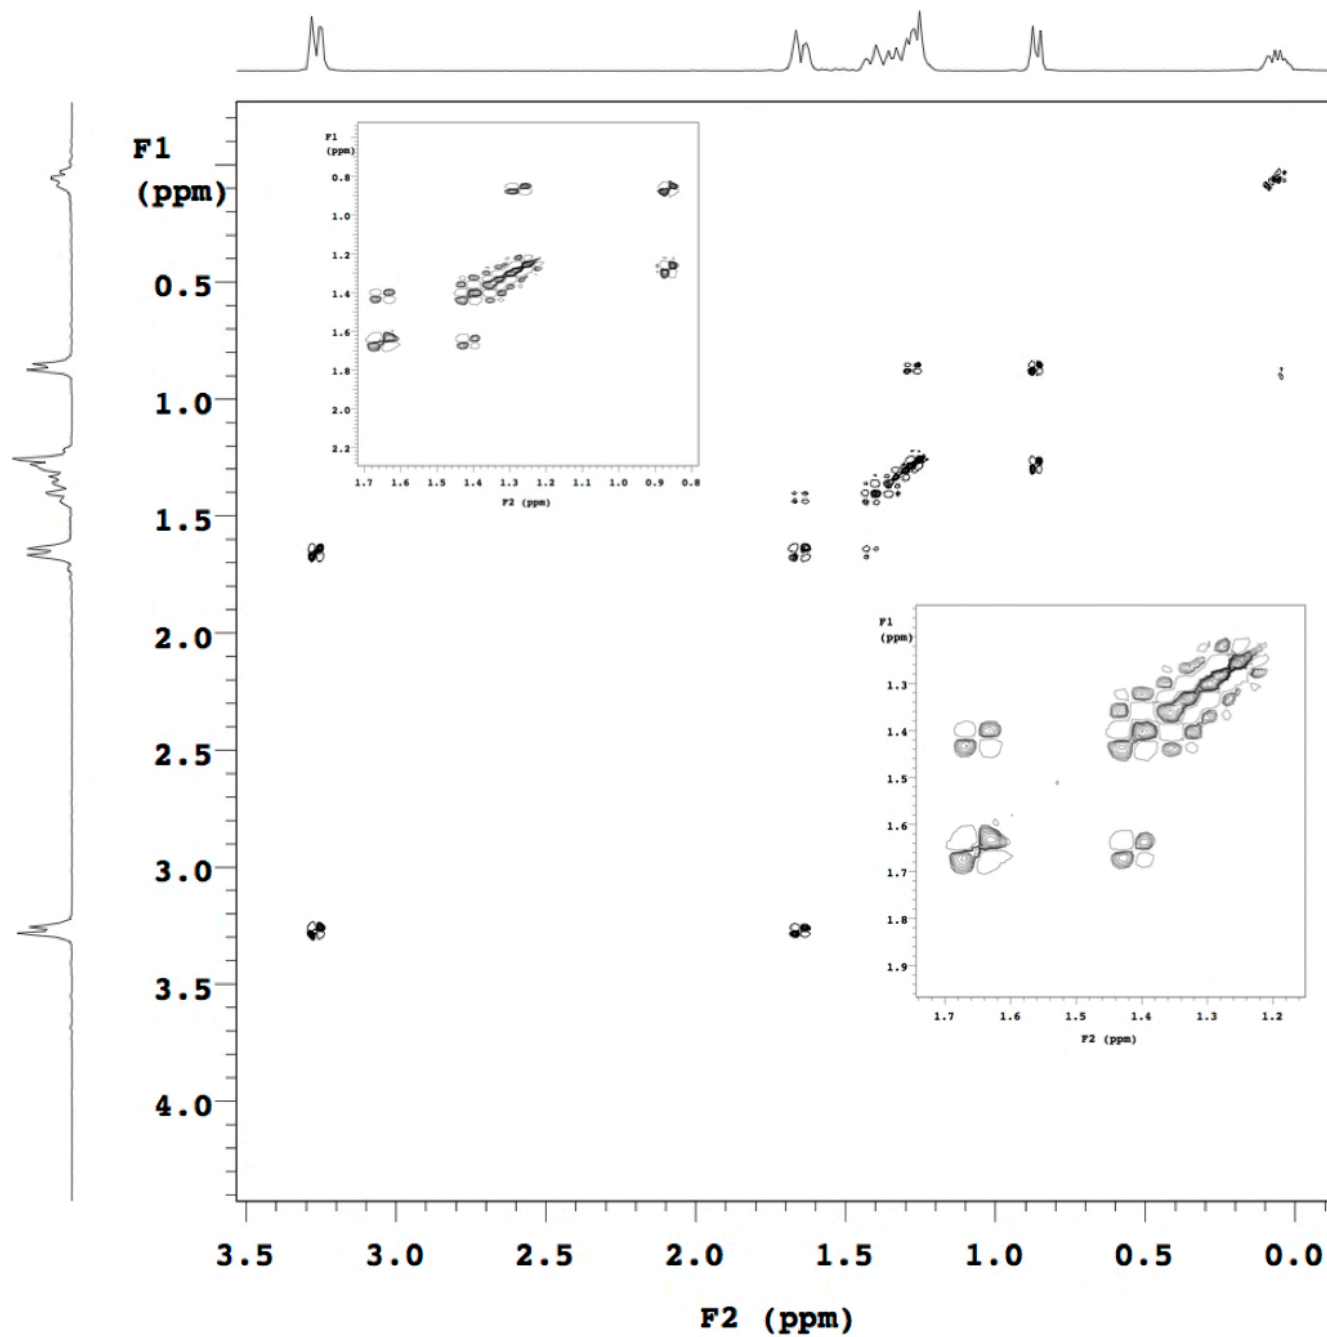

Figure S4 2D-gDQCOSY NMR spectrum of the purified dichloromethane fraction in CDCl<sub>3</sub>.

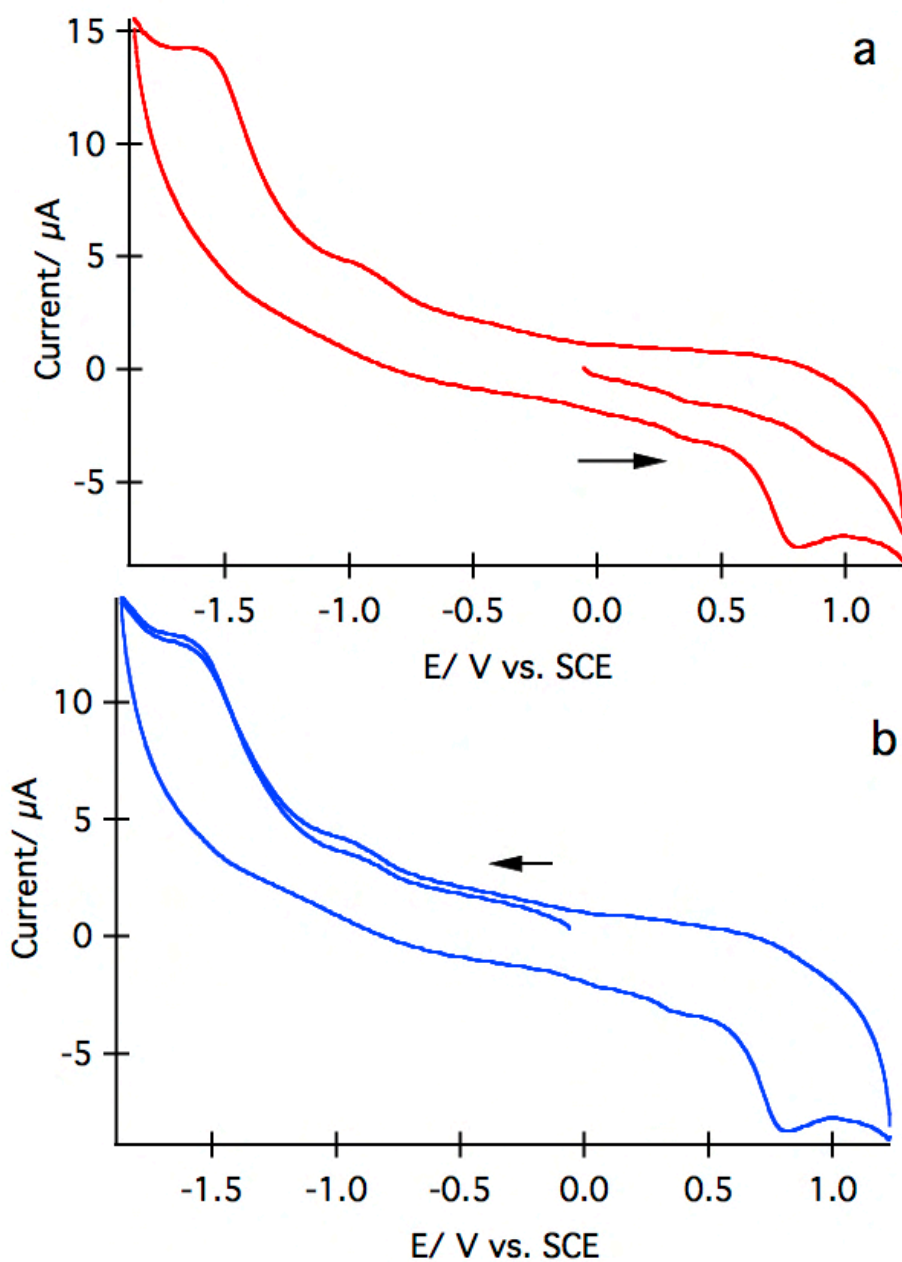

**Figure S5** Cyclic voltammograms (CVs) of acetonitrile fraction obtained in dichloromethane containing 0.1 M tetra-*n*-butylammonium hexafluorophosphate (TBAPF<sub>6</sub>) as supporting electrolyte. (a) and (b) show scanning potential towards the positive and negative values. Scan rate: 100 mV/s, T=25°C.

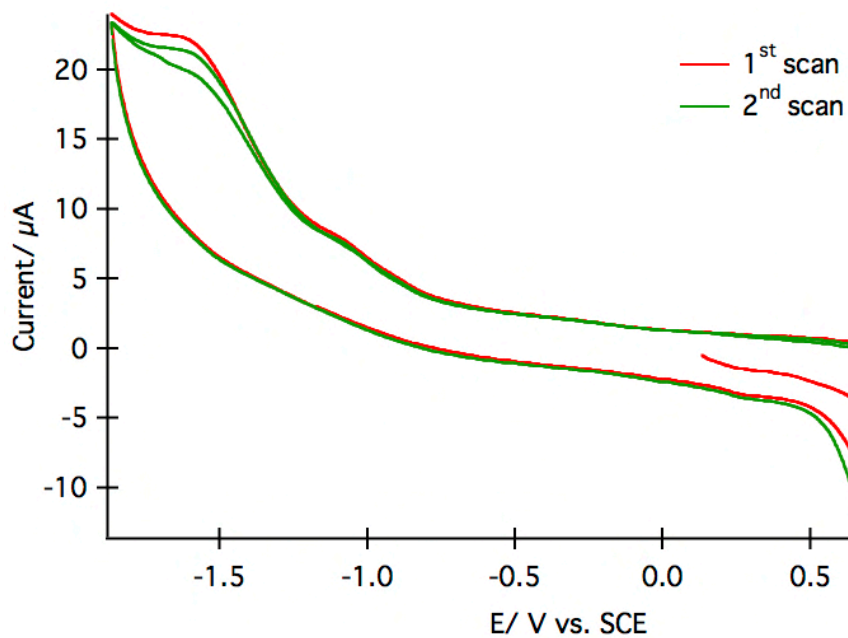

**Figure S6** Cyclic voltammograms (CVs) of dichloromethane fraction recorded in dichloromethane containing 0.1 M tetra-*n*-butylammonium hexafluorophosphate (TBAPF<sub>6</sub>) as supporting electrolyte. The red curves and green cycles, scan rate was 100 mV/s, T=25°C.

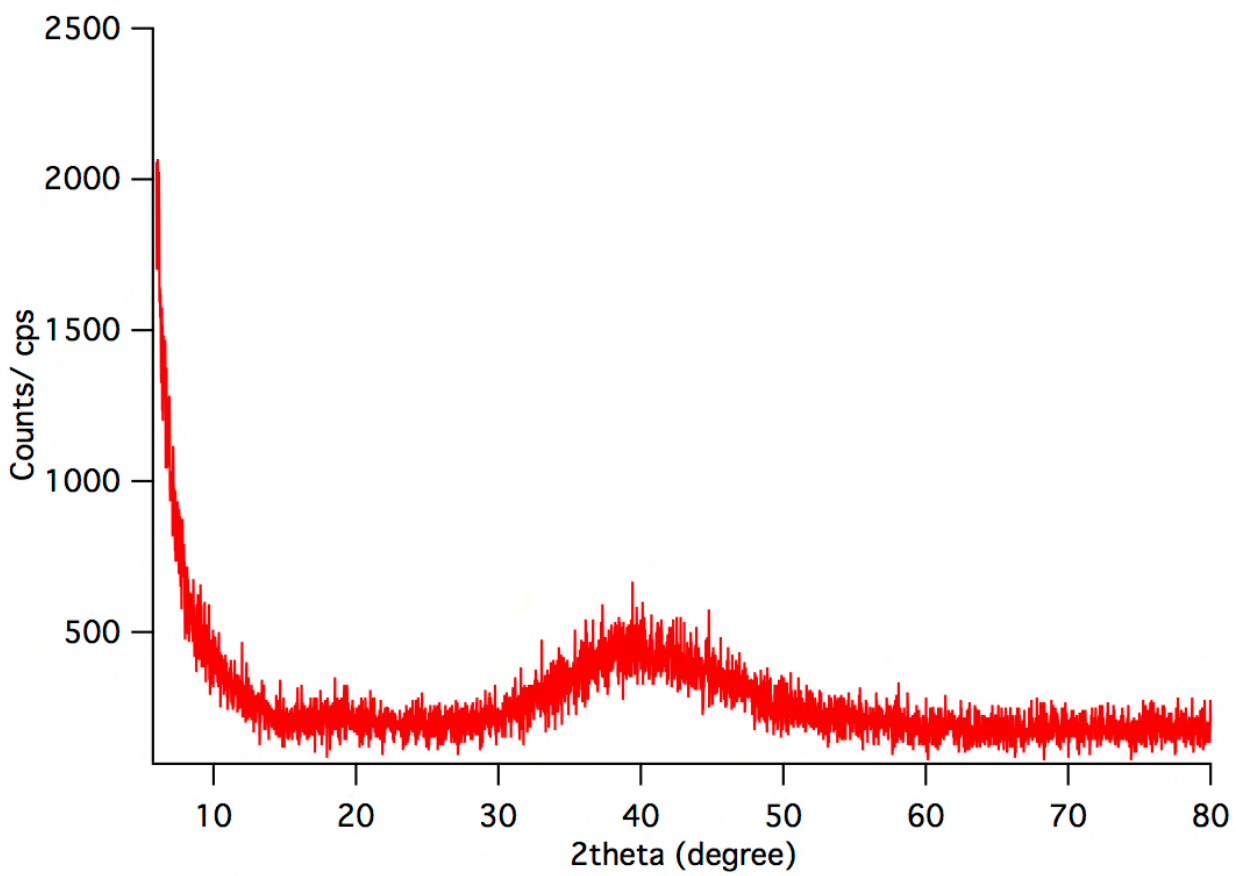

**Figure S7** Powder X-ray diffraction (PXRD) spectrum of the purified  $\text{Au}_{23}(\text{SC}_4\text{H}_9)_{16}\cdot\text{TOA}$ , dichloromethane fraction.
